# Supplementary material for: Rapid cationic defect and anion dual-regulated layered double hydroxides for efficient water oxidation
Source: Royal Society of Chemistry journal article supplement (doi:10.1039/c8nr04402c), 2018-01-01
Supplement: c8nr04402c1.pdf [file c8nr04402c1.pdf]

## Supporting Information

### **Rapid Cationic Defect and Anion Dual-Regulated Layered Double Hydroxides for Efficient Water Oxidation**

Liangliang Huang<sup>a</sup>, Ru Chen<sup>a, \*</sup>, Chao Xie<sup>a</sup>, Chen Chen<sup>a</sup>, Yanyong Wang<sup>a</sup>, Yifan Zeng<sup>a</sup>, Dawei Chen<sup>a,b, \*</sup>, and Shuangyin Wang<sup>a,c,d,\*</sup>

<sup>a</sup>State Key Laboratory of Chem/Bio-Sensing and Chemometrics, Provincial Hunan Key Laboratory for Graphene Materials and Devices, College of Chemistry and Chemical Engineering, Hunan University, Changsha, 410082, P. R. China.

<sup>b</sup>College of Materials Science and Engineering, Qingdao University of Science and Technology, 53 Zhengzhou Road, Qingdao, Shandong 266042, P. R. China.

<sup>c</sup>A Key Laboratory of Optoelectronic Devices and Systems of Ministry of Education and Guangdong Province, Shenzhen University, Shenzhen, 518060, P. R. China.

<sup>d</sup>Shenzhen Research Institute of Hunan University, Shenzhen, 518057, P. R. China.

\*Corresponding author E-mail: chenru@hnu.edu.cn; chendw@hun.edu.cn;  
shuangyinwang@hnu.edu.cn.

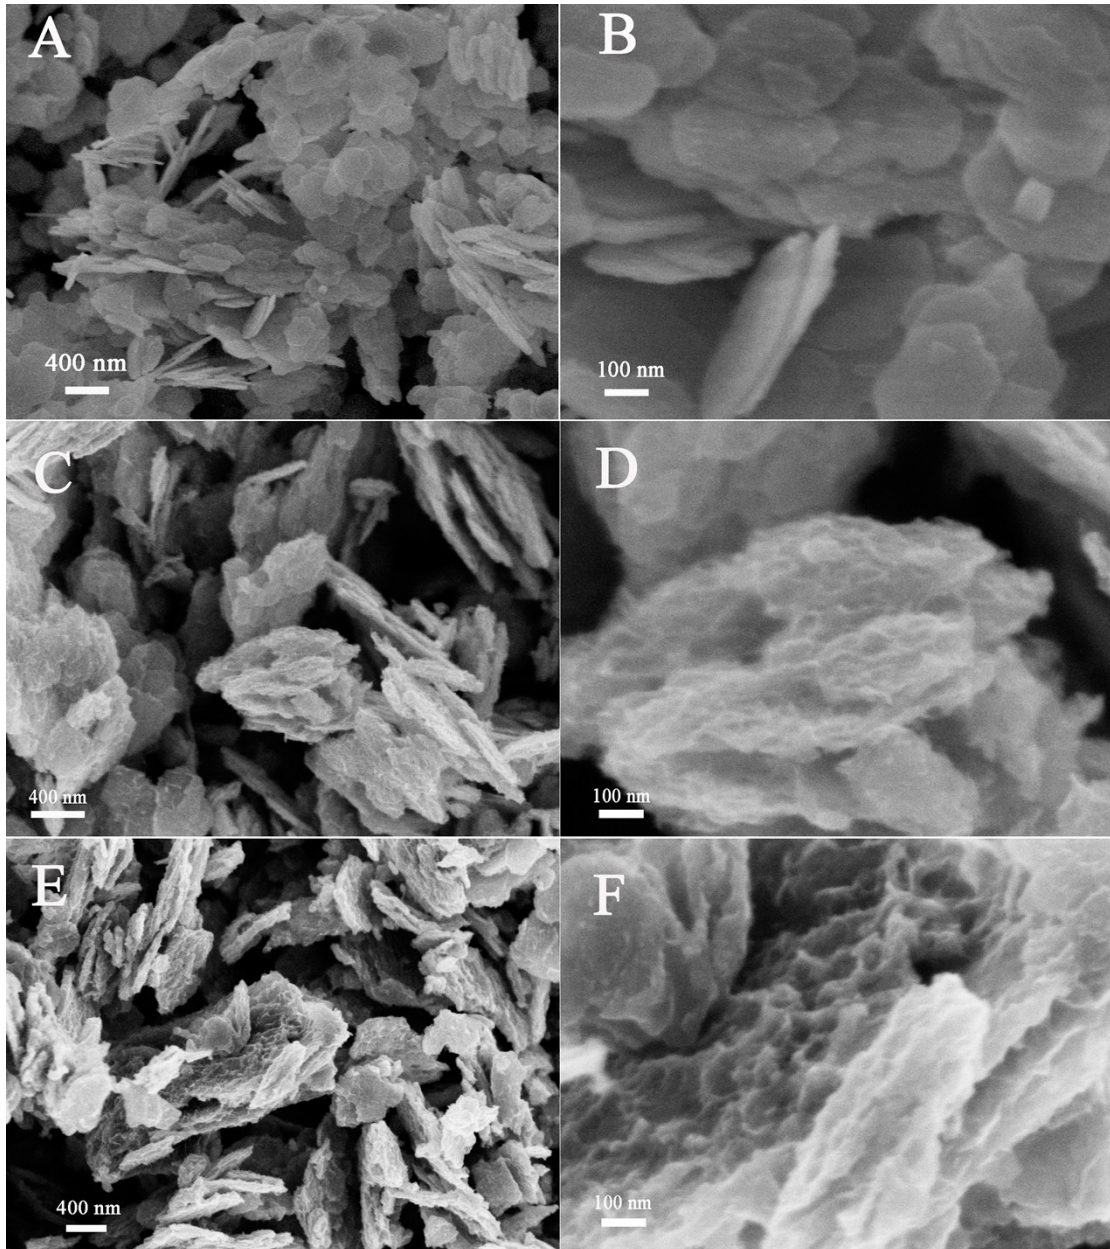

**Figure S1.** SEM images of (A, B) modified water DBD plasma-1 min; (C, D) modified water DBD plasma-3 min; and (E, F) modified water DBD plasma -30 min.

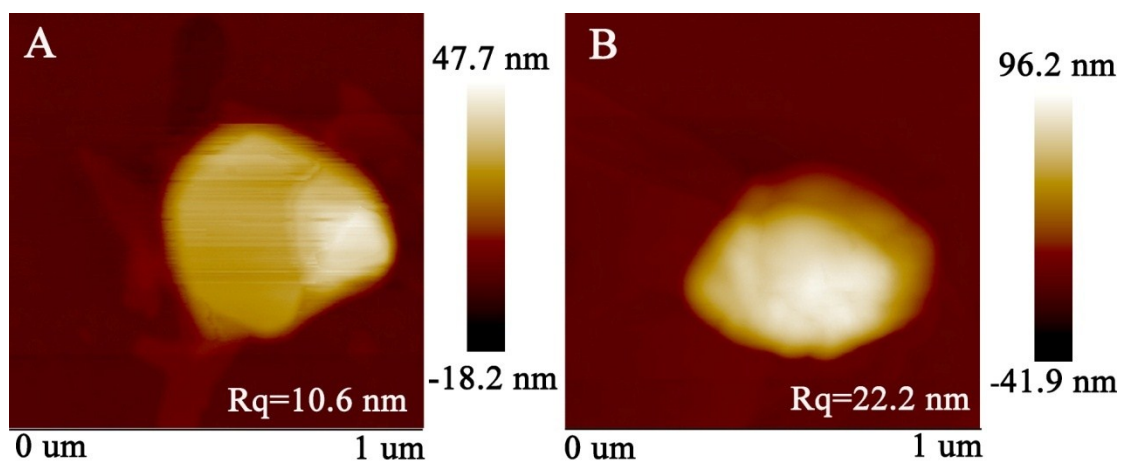

**Figure S2.** AFM images of A) CoAl LDHs and B) PS-CoAl LDHs. Rq= the average surface roughness (RMS).

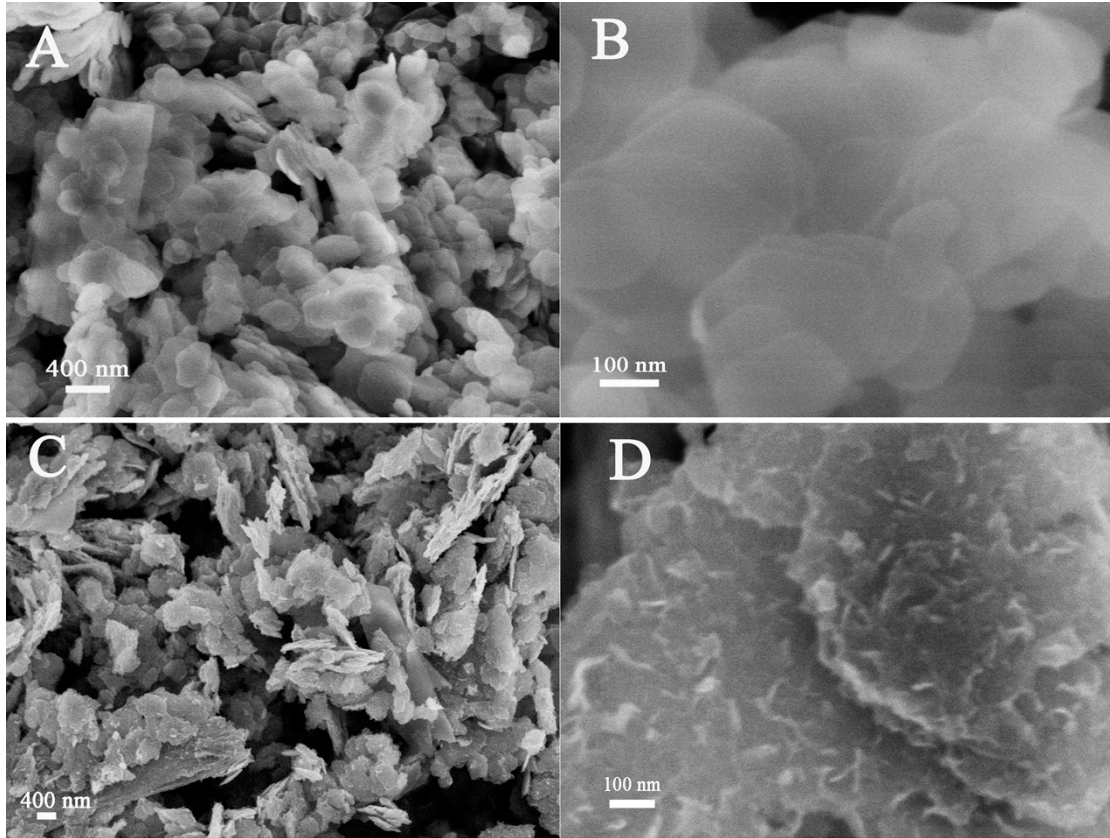

**Figure S3.** SEM images of (A, B) P-CoAl LDHs and (C, D) S-CoAl LDHs.

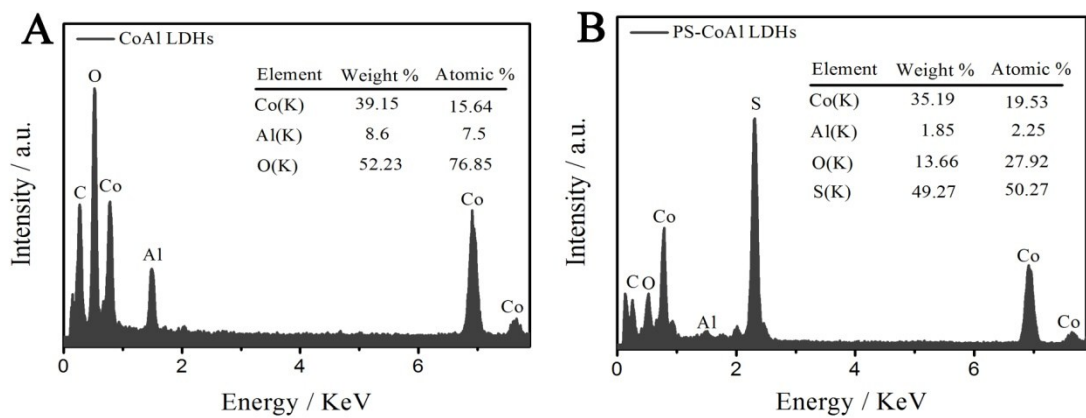

**Figure S4.** The energy-dispersive X-ray (EDX) images of A) CoAl LDHs and B) PS-CoAl LDHs.

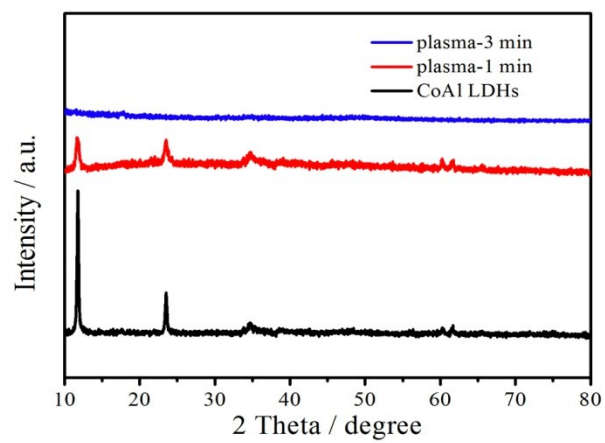

**Figure S5.** XRD patterns of the plasma irradiation for 1 min, 3 min, and pristine CoAl LDHs.



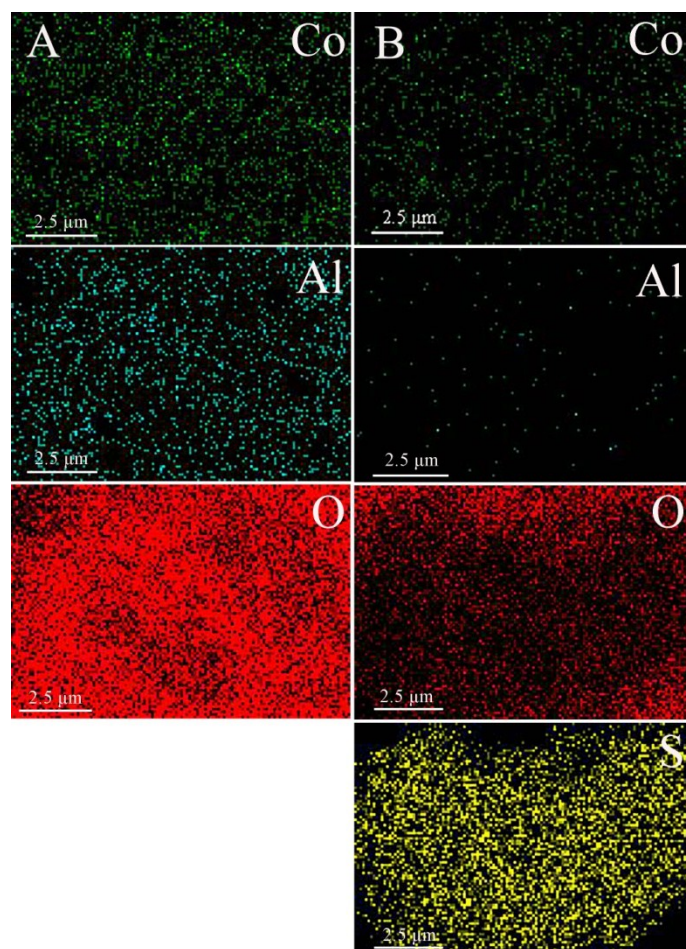

**Figure S6.** SEM-EDS mapping images of A) CoAl LDHs and B) PS-CoAl LDHs.

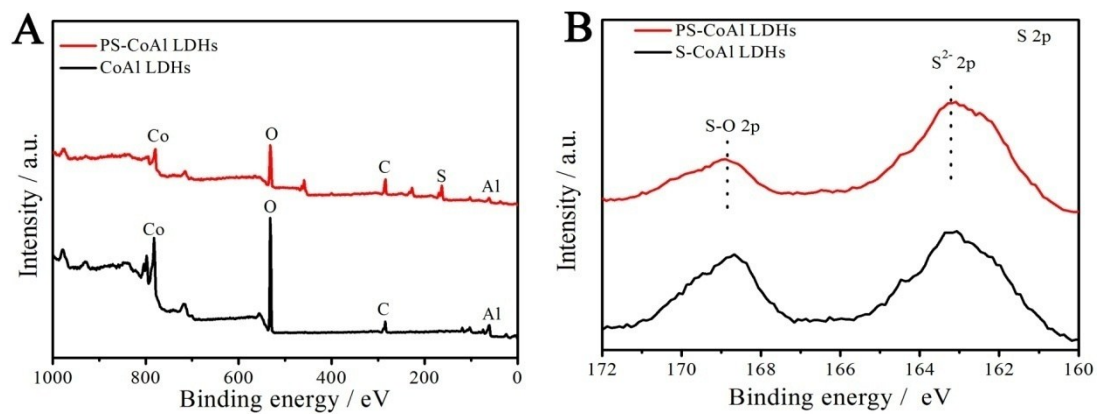

**Figure S7.** A) XPS survey spectra of CoAl LDHs and PS-CoAl LDHs, B) S 2p XPS peaks of S-CoAl LDHs and PS-CoAl LDHs.



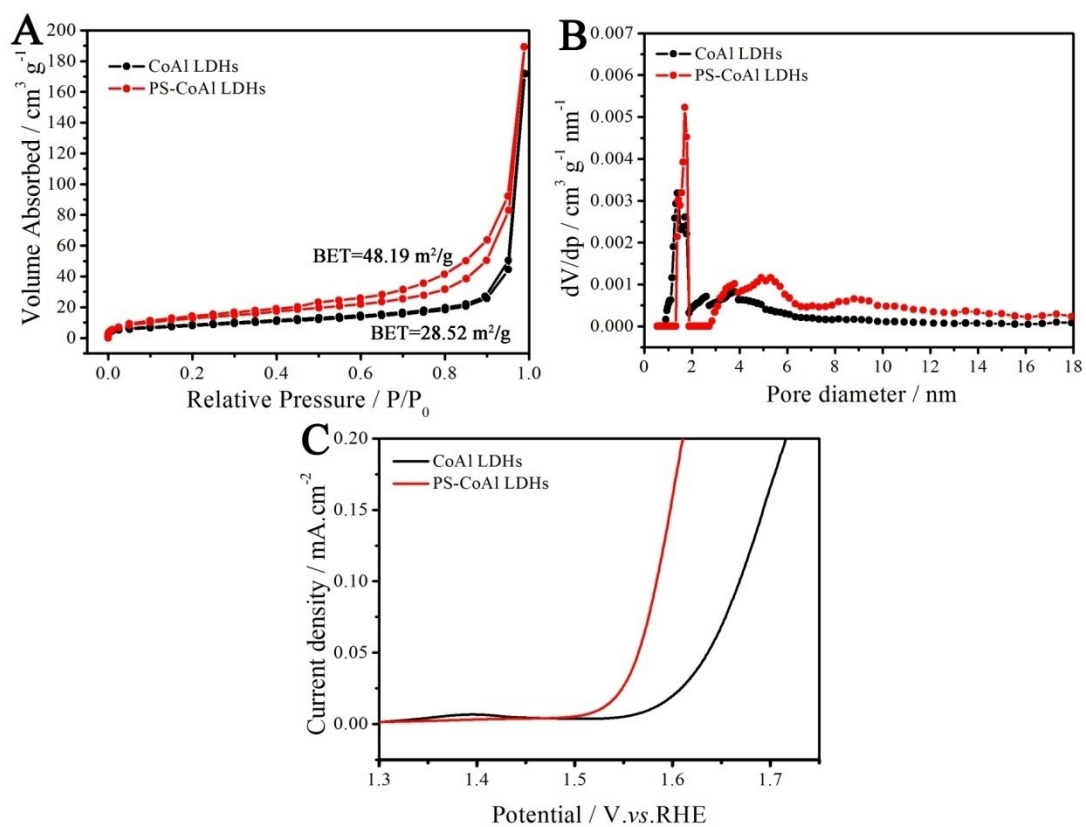

**Figure S8.** A) Nitrogen adsorption-desorption isotherms of CoAl LDHs and PS-CoAl LDHs; B) Corresponding pore size distribution; C) The OER performance of CoAl LDHs and PS-CoAl LDHs after BET normalization.

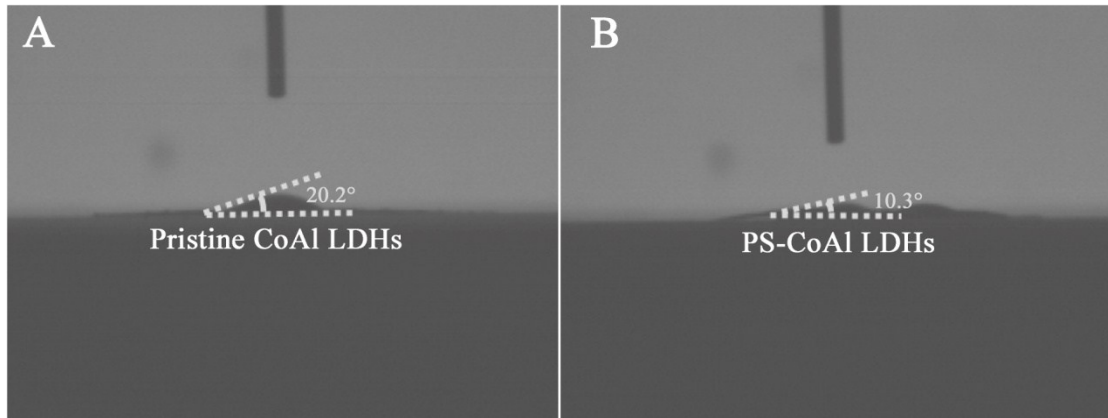

**Figure S9.** Contact angle measurements of A) pristine CoAl LDHs and B) PS-CoAl LDHs.

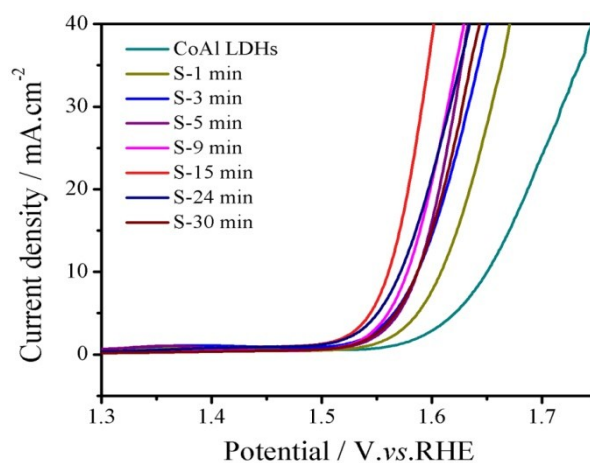

**Figure S10.** LSV polarization curves of CoAl LDHs by modified water plasma treatments for different time.

The optimal DBD plasma treatment time is 15 min. With the increase of time, the content of sulfur gradually increased, and the appropriate sulfur/oxygen ratio is achieved at 15 minutes to boost OER activity.

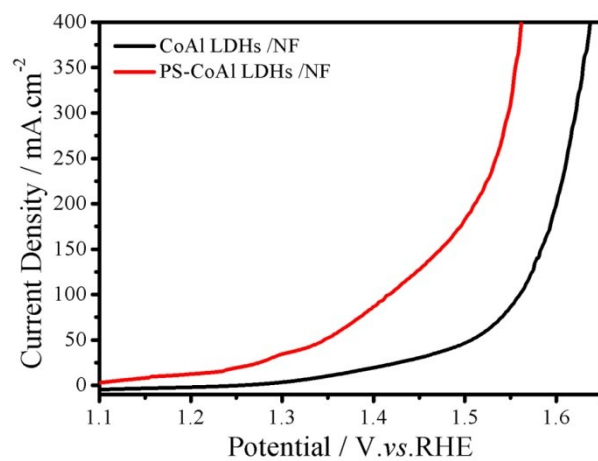

**Figure S11.** LSV polarization curves of CoAl LDHs and PS-CoAl LDH on NF.

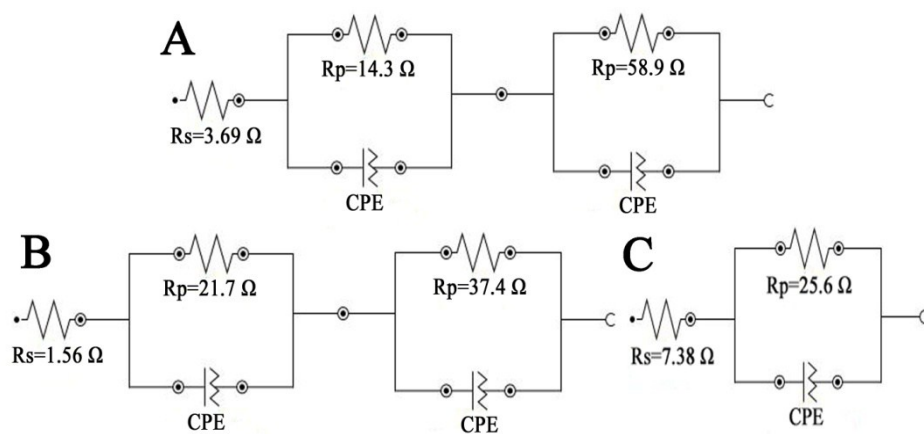

**Figure S12.** Electrochemical impedance spectroscopy (EIS) fitting results for A) CoAl LDHs; B) S-CoAl LDHs and C) PS-CoAl LDHs.  $R_s$ : electrolyte resistance,  $R_p$ : charge-transfer resistance, CPE: constant-phase element.

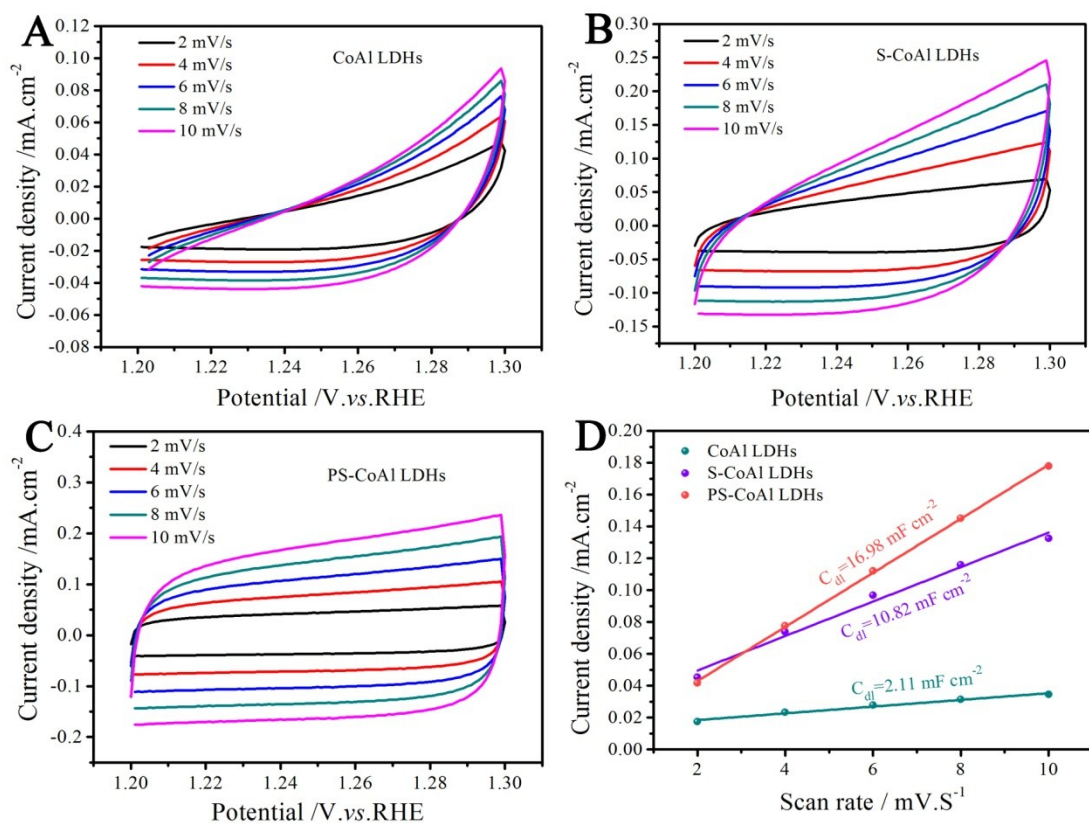

**Figure S13.** Electrochemical surface area (ESCA) tests of CoAl LDHs, S-CoAl LDHs and PS-CoAl LDHs towards OER in 1 M KOH. A) Cyclic voltammety curves of A) CoAl LDHs, B) S-CoAl LDHs and C) PS-CoAl LDHs with different scanning rates. D) The capacitive current measured at 1.27 V vs RHE was plotted as a function of scan rate CoAl LDHs, S-CoAl LDHs and PS-CoAl LDHs.



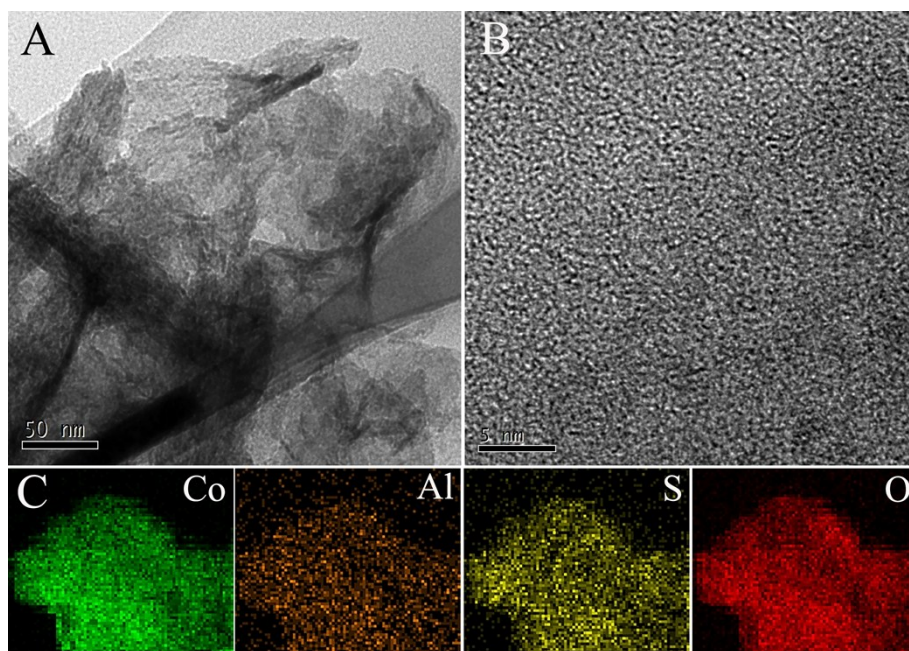

**Figure S14.** TEM and HRTEM images (A and B) of PS-CoAl LDHs after the electrochemical durability test; B) TEM-EDX mapping images of PS-CoAl LDHs after the electrochemical durability test.

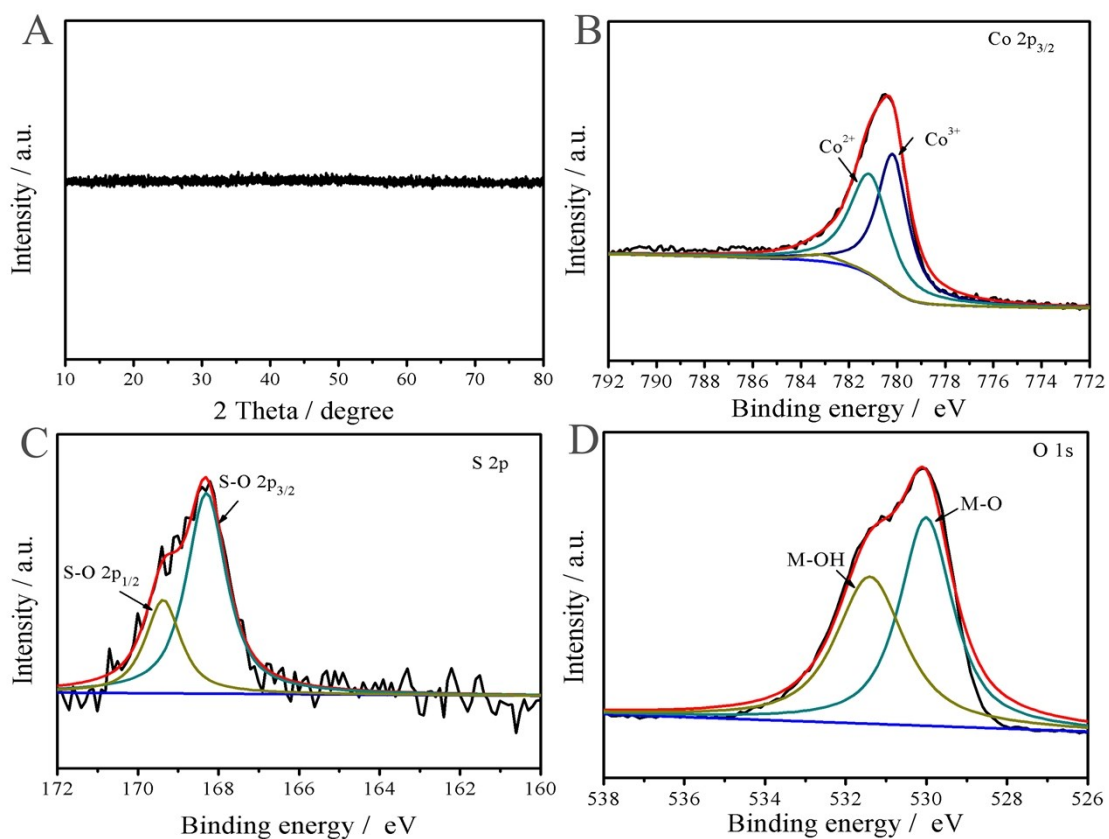

**Figure S15.** A) XRD pattern of PS-CoAl LDHs after the electrochemical durability test; B) Co  $2p_{3/2}$ , C) S  $2p$ , and D) O  $1s$  spectra of PS-CoAl LDHs after the electrochemical durability test.

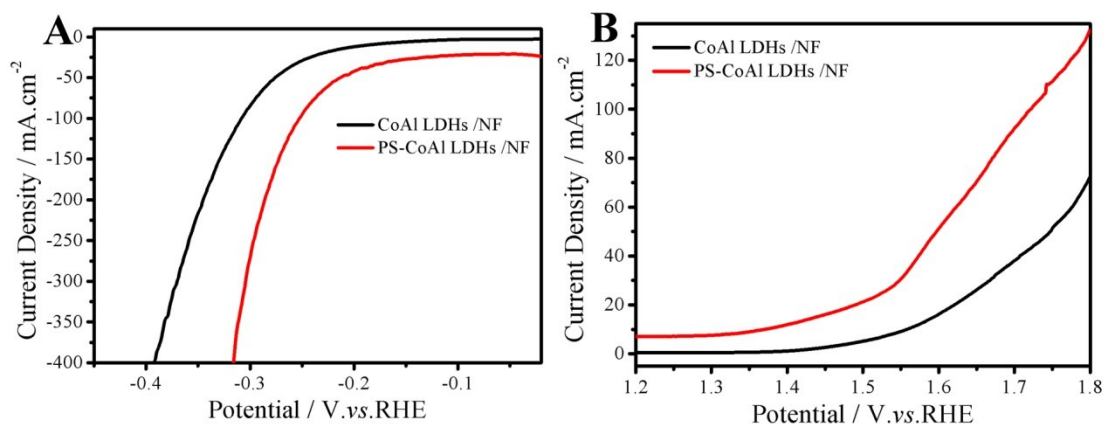

**Figure S16.** A) LSV polarization curves of CoAl LDHs and PS-CoAl LDH on NF; B) LSV polarization curves of CoAl LDHs and PS-CoAl LDH on NF for overall water splitting.

**Table S1.** Summarization the content of different elements in CoAl LDHs and PS-CoAl LDHs

| <b>Sample</b> | <b>Co (At%)</b> | <b>Al (At%)</b> | <b>S (At%)</b> | <b>O (At%)</b> |
|---------------|-----------------|-----------------|----------------|----------------|
| CoAl LDHs     | 20.35           | 7.86            | 0              | 71.79          |
| PS-CoAl LDHs  | 10.12           | 0.83            | 30.99          | 58.06          |

**At %:atom percentage content**

**Table S2.** Comparison results of the XPS for Co 2p<sub>3/2</sub> spectra of CoAl LDHs, S-CoAl LDHs, and PS-CoAl LDHs.

| Co species (At %)-<br>CoAl LDHs |  | Co species (At %)-<br>S-CoAl LDHs |       | Co species (At %)-<br>PS-CoAl LDHs |       |
|---------------------------------|--|-----------------------------------|-------|------------------------------------|-------|
| Co <sup>2+</sup> -OH/O          |  | Co <sup>2+</sup> -OH/O            | Co-S  | Co <sup>2+</sup> -OH/O             | Co-S  |
| 54.75                           |  | 52.65                             | 47.35 | 30.61                              | 69.39 |

**Table S3.** Comparison results of the XPS for O 1s spectra of CoAl LDHs, S-CoAl LDHs, and PS-CoAl LDHs.

| <b>O species (At %)-<br/>CoAl LDHs</b> | <b>O species (At %)-<br/>S-CoAl LDHs</b> | <b>O species (At %)-<br/>PS-CoAl LDHs</b> |       |                  |
|----------------------------------------|------------------------------------------|-------------------------------------------|-------|------------------|
| M-OH                                   | M-OH                                     | M-O                                       | M-OH  | H <sub>2</sub> O |
| 100                                    | 100                                      | 25.21                                     | 56.22 | 18.57            |



**Table S4.** Comparison of OER activity of the PS-CoAl LDHs with recently reported catalyst.

| Catalysts                                                                                 | Electrolyte solution | Substrate              | $\eta$ (mV) at 10 mA cm <sup>-2</sup> | Tafel slope (mV dec <sup>-1</sup> ) | Reference         |
|-------------------------------------------------------------------------------------------|----------------------|------------------------|---------------------------------------|-------------------------------------|-------------------|
| <b>PS-CoAl LDHs</b>                                                                       | 1 M KOH              | glass carbon electrode | 329                                   | 61                                  | <b>This work</b>  |
| Co <sub>0.5</sub> Fe <sub>0.5</sub> S@N-MC                                                | 1 M KOH              | glass carbon electrode | 410                                   | 159                                 | S <sup>[1]</sup>  |
| Co <sub>9</sub> S <sub>8</sub> /S-C                                                       | 1 M KOH              | glass carbon electrode | 339                                   | 64                                  | S <sup>[2]</sup>  |
| Co-P film                                                                                 | 1 M KOH              | copper foils           | 345                                   | 47                                  | S <sup>[3]</sup>  |
| Co <sub>3</sub> AlS <sub>1.5</sub> (OH) <sub>10</sub>                                     | 0.1M KOH             | glass carbon electrode | 414                                   |                                     | S <sup>[4]</sup>  |
| CoS-Co(OH) <sub>2</sub> @a MoS <sub>2+x</sub>                                             | 1 M KOH              | glass carbon electrode | 380                                   | 68                                  | S <sup>[5]</sup>  |
| Monocrystalline CoZn hydroxides                                                           | 1 M KOH              | Zn foil                | 430                                   | 68                                  | S <sup>[6]</sup>  |
| Ultrathin CoMn LDHs                                                                       | 1 M KOH              | glass carbon electrode | 350                                   | 43                                  | S <sup>[7]</sup>  |
| Co(OH)(C <sub>6</sub> H <sub>5</sub> COO)·H <sub>2</sub> O Nanobelts                      | 1 M KOH              | glass carbon electrode | 360                                   | 76                                  | S <sup>[8]</sup>  |
| NiFe@g-C <sub>3</sub> N <sub>4</sub> /CNTs                                                | 1 M KOH              | glass carbon electrode | 326                                   | 67                                  | S <sup>[9]</sup>  |
| Co <sub>3</sub> O <sub>4</sub> /NiCo <sub>2</sub> O <sub>4</sub> double-shelled nanocages | 1 M KOH              | Ni foam                | 340                                   | 88                                  | S <sup>[10]</sup> |

## References:

- [1] M. Shen, C. Ruan, Y. Chen, C. Jiang, K. Ai, and L. Lu, *ACS Appl. Mater. Inter.*, 2015, **7**, 1207-1218.
- [2] H. Qian, J. Tang, Z. Wang, J. Kim, J. H. Kim, S. M. Alshehri, E. Yanmaz, X. Wang, and Y. Yamauchi, *Chem. - Eur. J.*, 2016, **22**, 18259-18264.
- [3] N. Jiang, B. You, M. Sheng, and Y. Sun, *Angew. Chem. Int. Ed.*, 2015, **54**, 6251-6254.
- [4] H. F. Wang, C. Tang, B. Wang, B. Q. Li, and Q. Zhang, *Adv. Mater.*, 2017, **29**, 1702327.
- [5] T. Yoon and K. S. Kim, *Adv. Funct. Mater.*, 2016, **26**, 7386-7393.
- [6] J. Wang, C. F. Tan, T. Zhu, and G. W. Ho, *Angew. Chem. Int. Ed.*, 2016, **128**, 10482-10486.
- [7] S. Fang and X. Hu, *J. Am. Chem. Soc.*, 2014, **136**, 16481-16484.
- [8] L. Huang, J. Jiang, and L. Ai, *ACS Appl. Mater. Inter.*, 2017, **9**, 7059-7067.
- [9] D. Liu, S. Ding, C. Wu, W. Gan, C. Wang, D. Cao, Z. U. Rehman, Y. Sang, S. Chen, and X. Zheng, *J. Mater. Chem. A.*, 2018, **6**, 6840-6846.
- [10] H. Hu, B. Guan, B. Xia, and X. W. Lou, *J. Am. Chem. Soc.*, 2015, **137**, 5590-5595.
